# Supplementary material for: Evaluation of Amyloid Polypeptide Aggregation Inhibition and Disaggregation Activity of A-Type Procyanidins
Source: MDPI journal article supplement (doi:10.3390/ph14111118), 2021-10-31
Supplement: s1 [file s1]

## Supplementary Materials

### Evaluation of aggregation inhibition and disaggregation activity of A-type procyanidins against amyloid polypeptides

Taisei Tanaka<sup>1</sup>·Vipul V. Betkekar<sup>2</sup>·Ken Ohmori<sup>2</sup>·Keisuke Suzuki<sup>2</sup>·Hideyuki Shigemori<sup>3,4\*</sup>

<sup>1</sup>Graduate School of Life and Environmental Sciences, University of Tsukuba, 1-1-1 Tennodai, Tsukuba, Ibaraki 305-8572, Japan

<sup>2</sup>Department of Chemistry, Tokyo Institute of Technology, 2-12-1, O-okayama, Meguroku, Tokyo 152-8551, Japan.

<sup>3</sup>Faculty of Life and Environmental Sciences, University of Tsukuba, 1-1-1 Tennodai, Tsukuba, Ibaraki 305-8572, Japan

<sup>4</sup>Microbiology Research Center for Sustainability (MiCS), University of Tsukuba, Tsukuba, Ibaraki 305-8572, Japan

E-mail: shigemori.hideyuk.fn@u.tsukuba.ac.jp

Tel: +81-29-853-4603

ORCID: 0000-0001-9778-8057

Figure S1. **Efficacy of compounds 1-9 and EGCG against A $\beta$ 42 aggregation.** The fibril formation of A $\beta$ 42 (25  $\mu$ M) was monitored by Th-T fluorescence and the presence of A: **1** (Procyanidin A2), B: **2** (Procyanidin A1), C: **3** (Proanthocyanidin A6), D: **4**, E: **5** (Proanthocyanidin A7), F: **6**, G: **7** (Me-Procyanidin A2), H: **8** ((-)-Epicatechin), I: **9** ((+)-Catechin) and J: EGCG. Fluorescence intensity was measured at an excitation wavelength of 420 nm and emission wavelength of 485 nm. Values represent the mean  $\pm$  SD (n = 6).

Figure S2. **Efficacy of compounds 1-9 and EGCG against A $\beta$ 42 fibrillogenesis visualized by use of TEM.** Fibril formation was observed after 24 h of incubation in 50  $\mu$ M PBS buffer. Scale bars: 1.0  $\mu$ m. A: A $\beta$ 42 + **1** (Procyanidin A2), B: A $\beta$ 42 + **2** (Procyanidin A1), C: A $\beta$ 42 + **3** (Proanthocyanidin A6), D: A $\beta$ 42 + **4**, E: A $\beta$ 42 + **5** (Proanthocyanidin A7), F: A $\beta$ 42 + **6**, G: A $\beta$ 42 + **7** (Me-Procyanidin A2), H: A $\beta$ 42 + **8** ((-)-Epicatechin), I: A $\beta$ 42 + **9** ((+)-Catechin), J: A $\beta$ 42 + EGCG and K: A $\beta$ 42.

Figure S3. **Efficacy of compounds 1-9 and EGCG against hIAPP aggregation.** The fibril formation of hIAPP (25  $\mu$ M) was monitored by Th-T fluorescence and the presence of A: **1** (Procyanidin A2), B: **2** (Procyanidin A1), C: **3** (Proanthocyanidin A6), D: **4**, E: **5** (Proanthocyanidin A7), F: **6**, G: **7** (Me-Procyanidin A2), H: **8** ((-)-Epicatechin), I: **9** ((+)-Catechin) and J: EGCG. Fluorescence intensity was measured at an excitation wavelength of 420 nm and emission wavelength of 485 nm. Values represent the mean  $\pm$  SD (n = 6).

Figure S4. **Efficacy of compounds 1-9 and EGCG against hIAPP fibrillogenesis visualized by use of TEM.** Fibril formation was observed after 24 h of incubation in 50  $\mu$ M PBS buffer. Scale bars: 1.0  $\mu$ m. A: hIAPP + **1** (Procyanidin A2), B: hIAPP + **2** (Procyanidin A1), C: hIAPP + **3** (Proanthocyanidin A6), D: hIAPP + **4**, E: hIAPP + **5** (Proanthocyanidin A7), F: hIAPP + **6**, G: hIAPP + **7** (Me-Procyanidin A2), H: hIAPP + **8** ((-)-Epicatechin), I: hIAPP + **9** ((+)-Catechin), J: hIAPP + EGCG and K: hIAPP.

Figure S5. **Efficacy of compounds 1, 3, 5, 7, 8, and EGCG against pre-existing A $\beta$ 42 fibrils.** A $\beta$ 42 (25  $\mu$ M) fibrils was quantified by monitoring Th-T fluorescence in the presence of varying concentrations of A: **1** (Procyanidin A2), B: **3** (Proanthocyanidin A6), C: **5** (Proanthocyanidin A7), D: **7** (Me-Procyanidin A2), E: **8** ((-)-Epicatechin) and F: EGCG. Fluorescence intensity was measured at an excitation wavelength of 420 nm

and emission wavelength of 485 nm. Values represent the mean  $\pm$  SD (n = 6).

Figure S6. Efficacy of compounds **1**, **3**, **7**, and **8** against pre-existing A $\beta$ 42 fibrils visualized by use of TEM.

Scale bars: 1.0  $\mu$ m. A: A $\beta$ 42 + **1** (Procyanidin A2), B: A $\beta$ 42 + **3** (Proanthocyanidin A6), C: A $\beta$ 42 + **5** (Proanthocyanidin A7), D: A $\beta$ 42 + **7** (Me-Procyanidin A2), E: A $\beta$ 42 + **8** ((-)-Epicatechin), F: A $\beta$ 42 + EGCG and G: A $\beta$ 42.

Figure S7. Efficacy of compounds **1**, **3**, **5**, **7**, **8** and EGCG against pre-existing hIAPP fibrils. hIAPP (25  $\mu$ M)

fibrils was quantified by monitoring Th-T fluorescence in the presence of varying concentrations of A: **1** (Procyanidin A2), B: **3** (Proanthocyanidin A6), C: **5** (Proanthocyanidin A7), D: **7** (Me-Procyanidin A2), E: **8** ((-)-Epicatechin) and F: EGCG. Fluorescence intensity was measured at an excitation wavelength of 420 nm and emission wavelength of 485 nm. Values represent the mean  $\pm$  SD (n = 6).

Figure S8. Efficacy of compounds **1**, **3**, **7**, and **8** against pre-existing hIAPP fibrils visualized by use of TEM.

Scale bars: 1.0  $\mu$ m. A: hIAPP + **1** (Procyanidin A2), B: hIAPP + **3** (Proanthocyanidin A6), C: hIAPP + **5** (Proanthocyanidin A7), D: hIAPP + **7** (Me-Procyanidin A2), E: hIAPP + **8** ((-)-Epicatechin), F: hIAPP + EGCG and G: hIAPP.

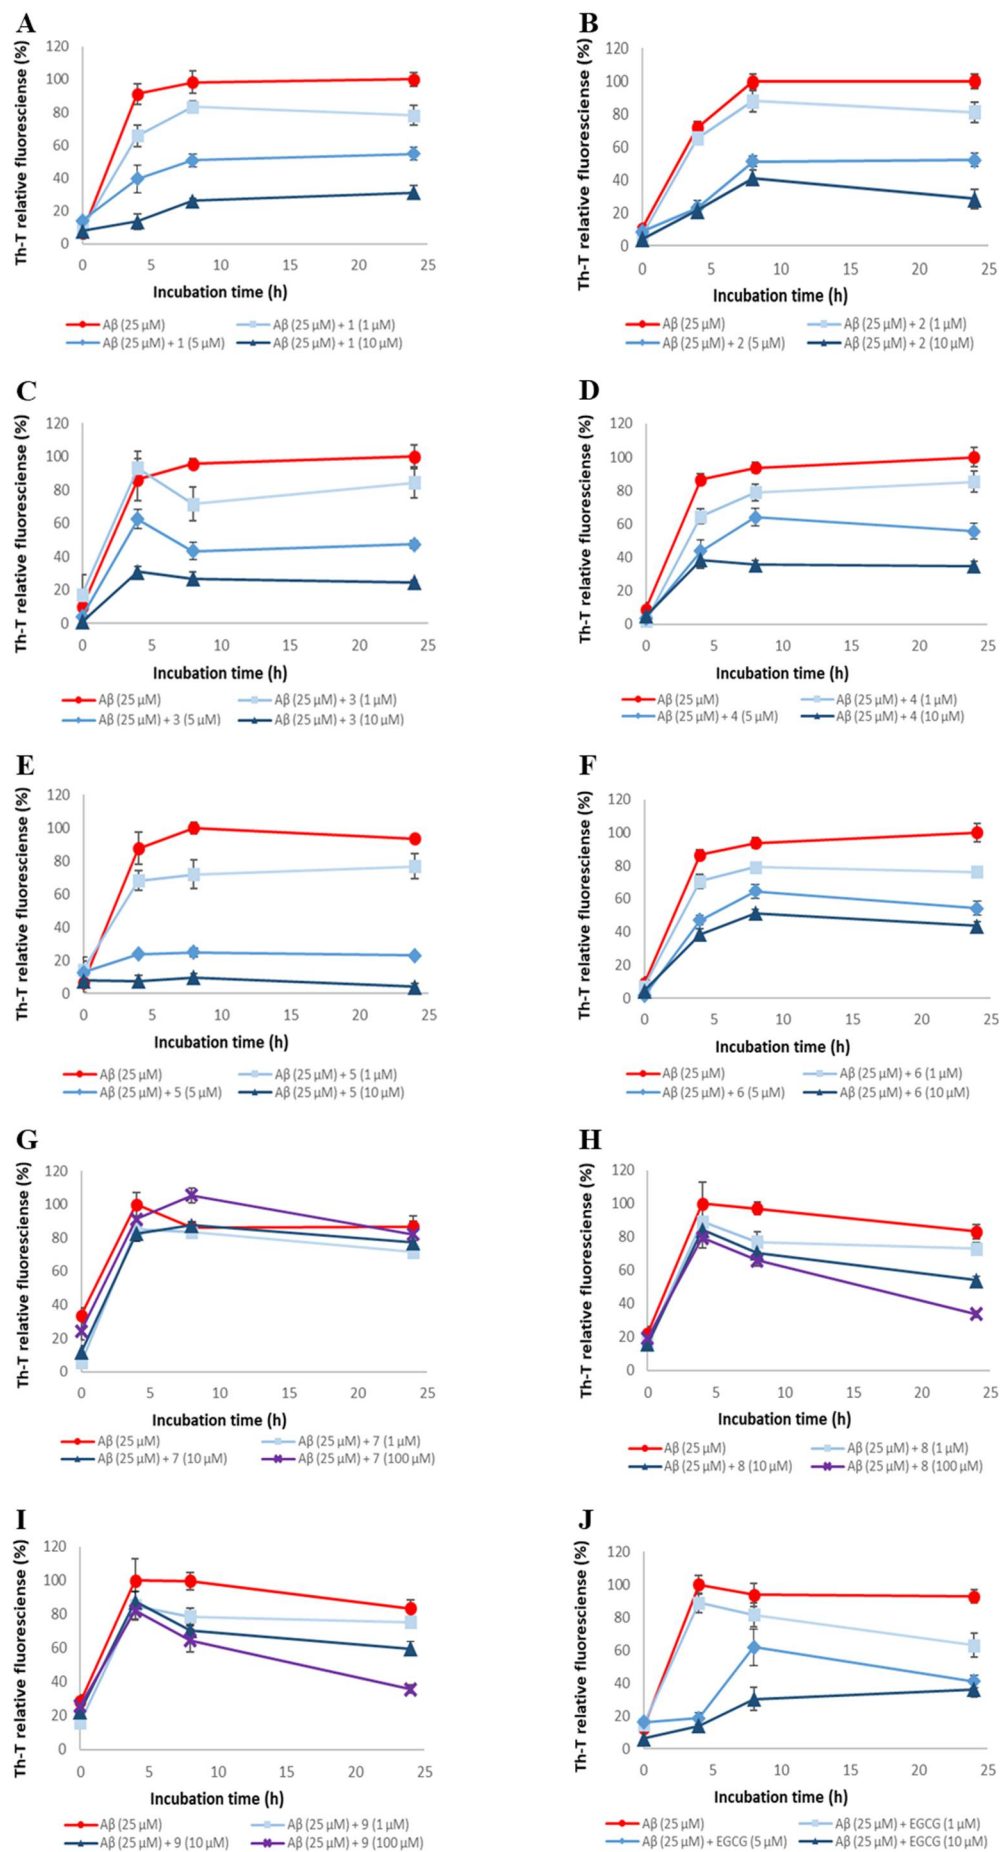

Figure S1

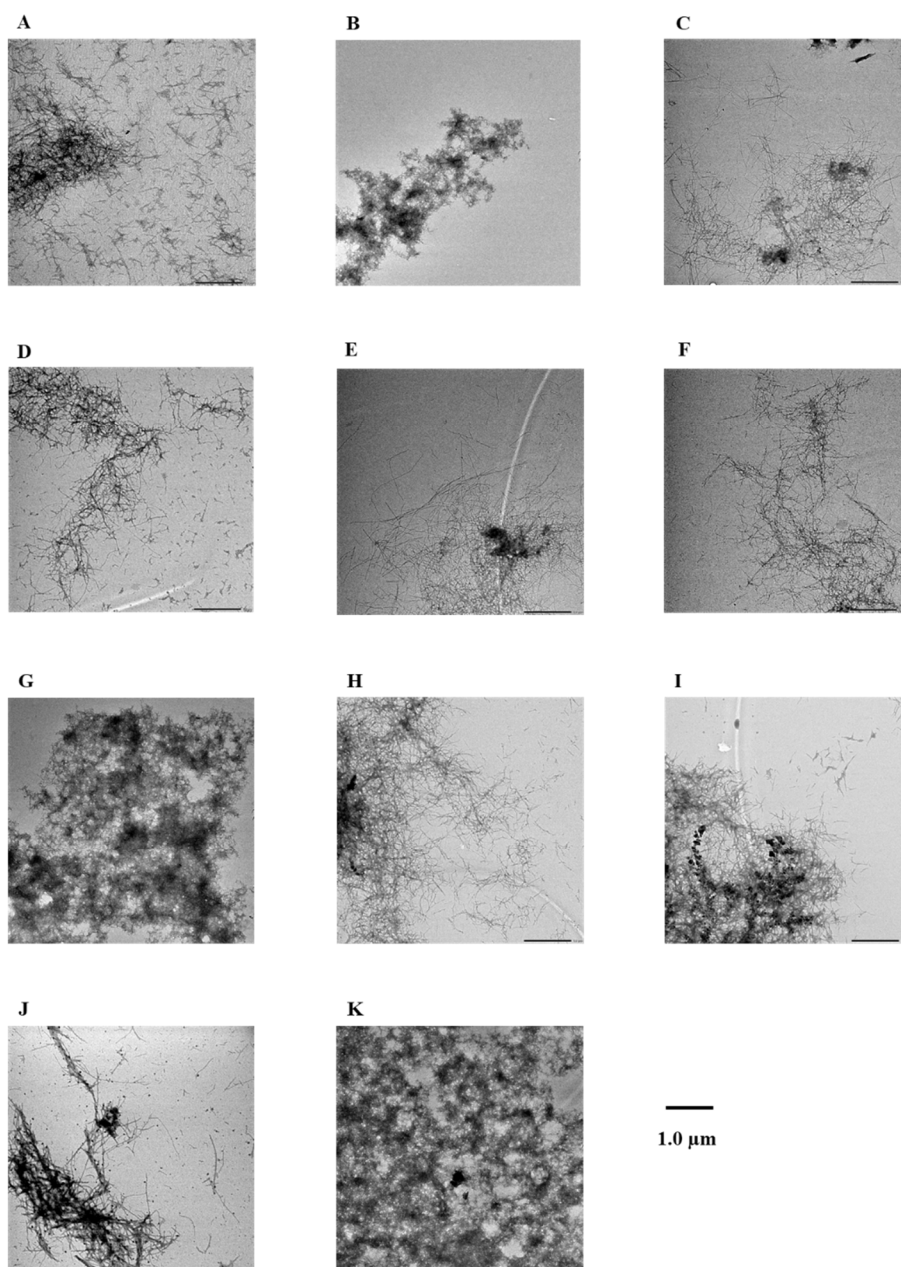

Figure S2

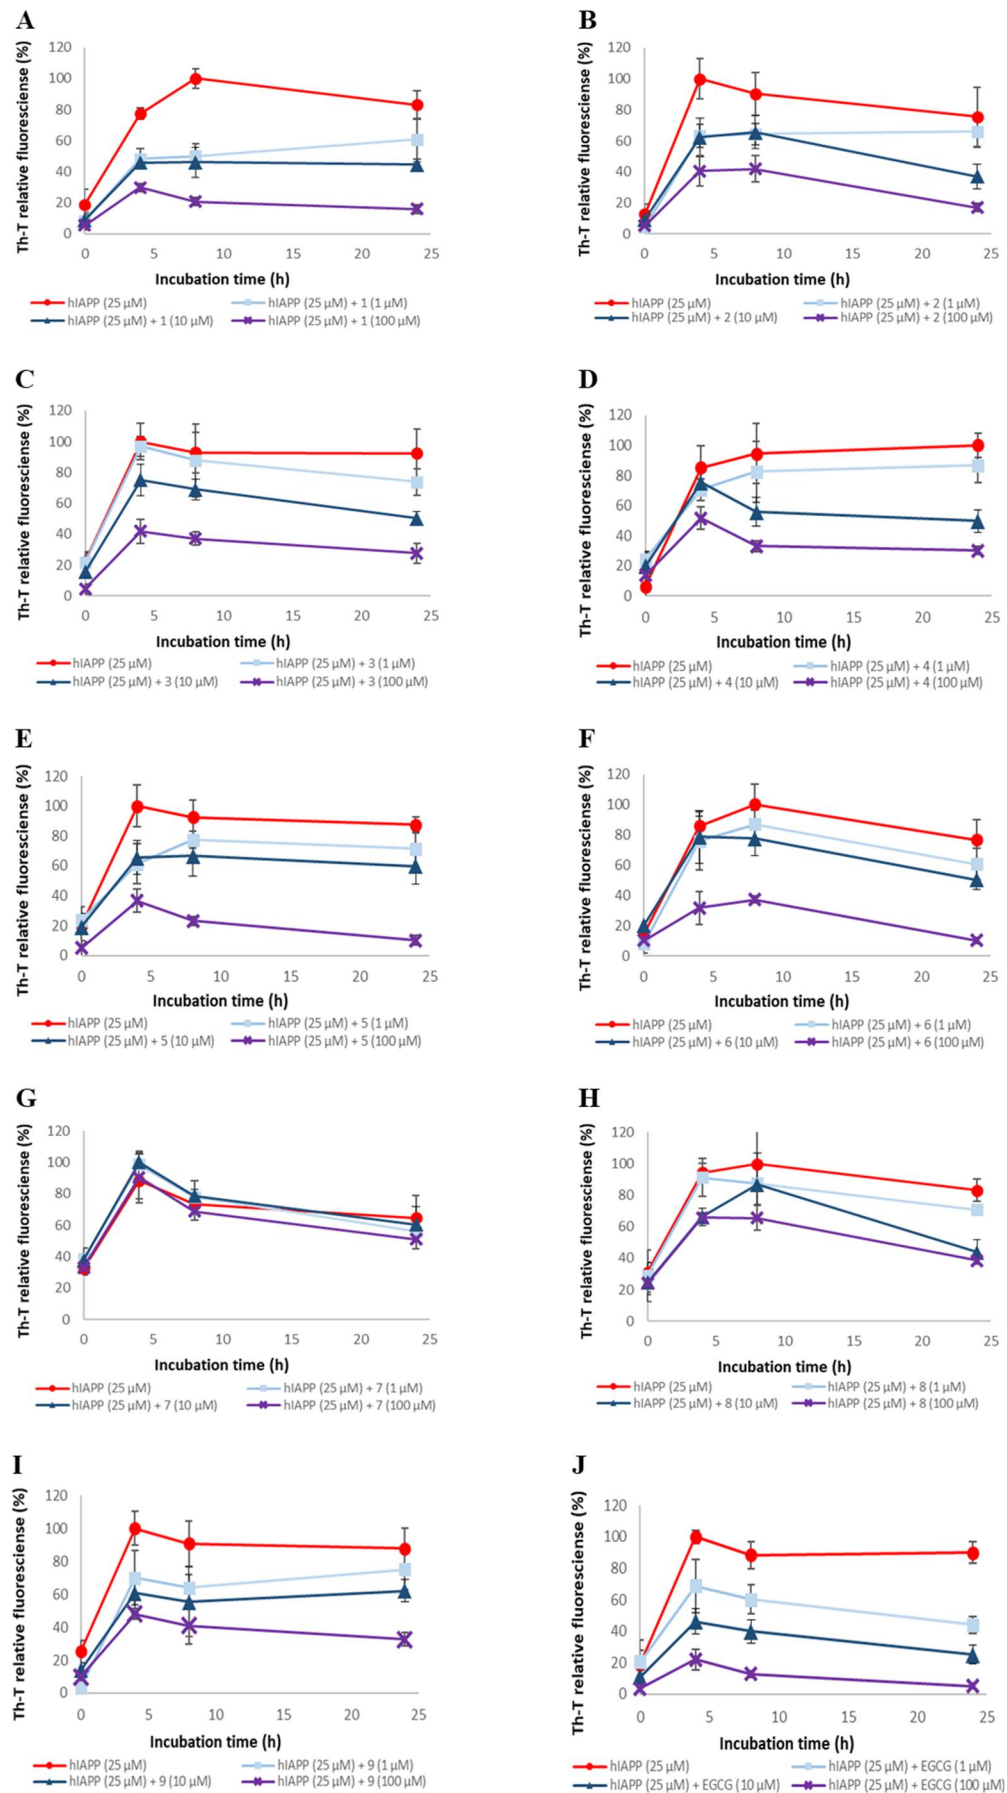

Figure S3

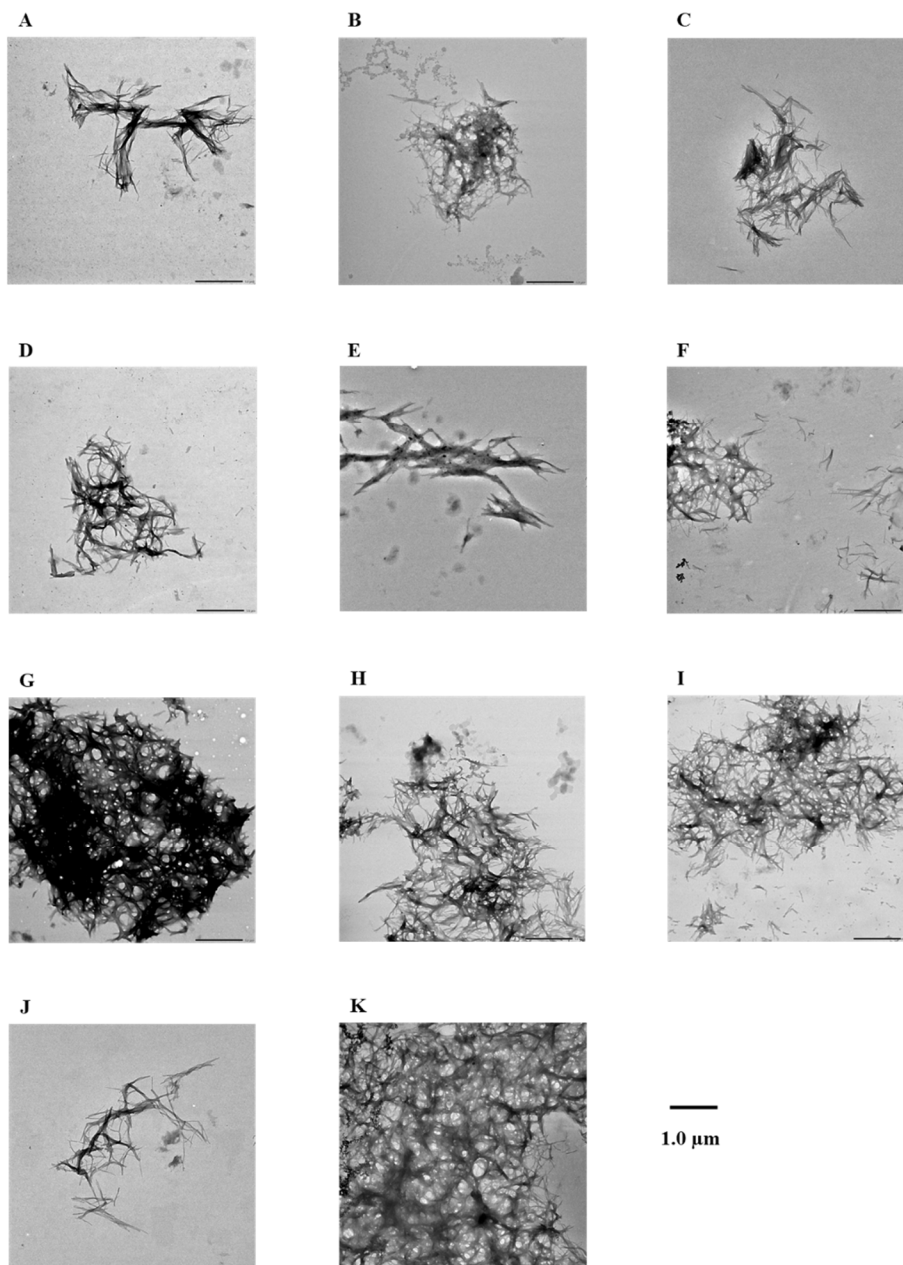

Figure S4



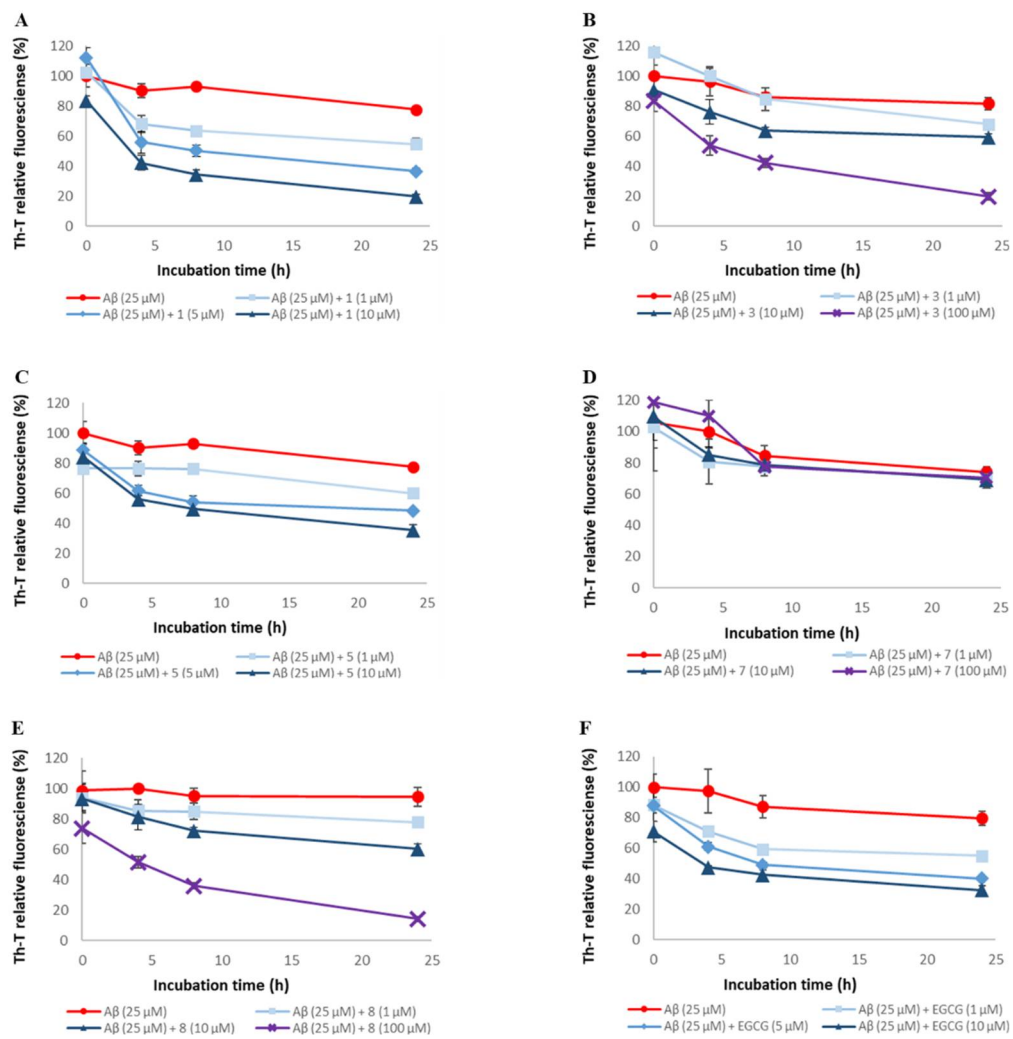

Figure S5

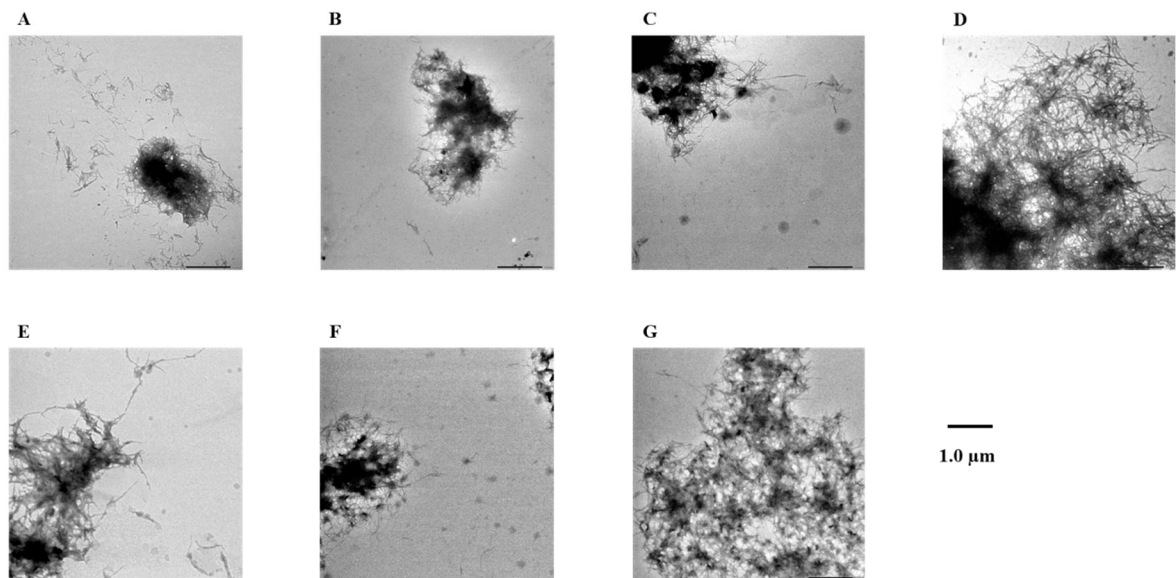

Figure S6



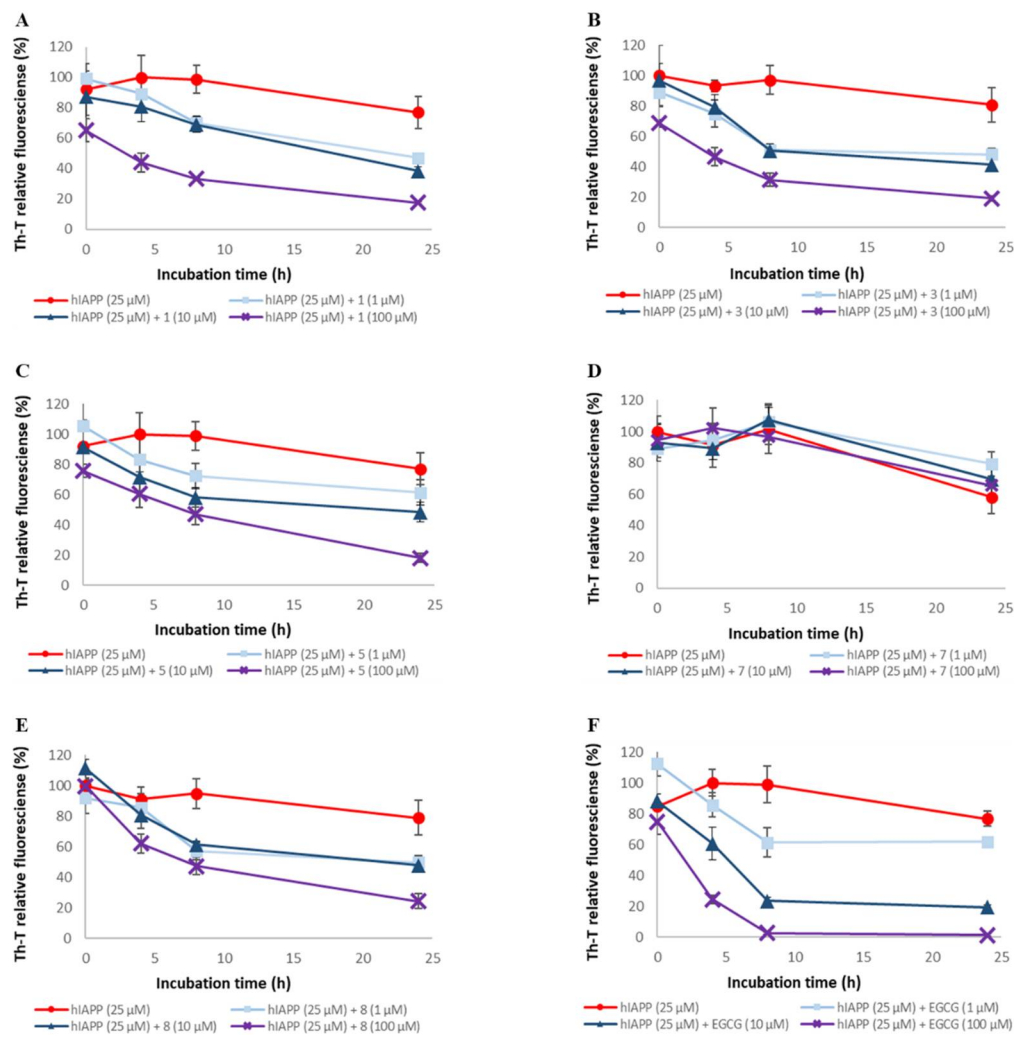

Figure S7

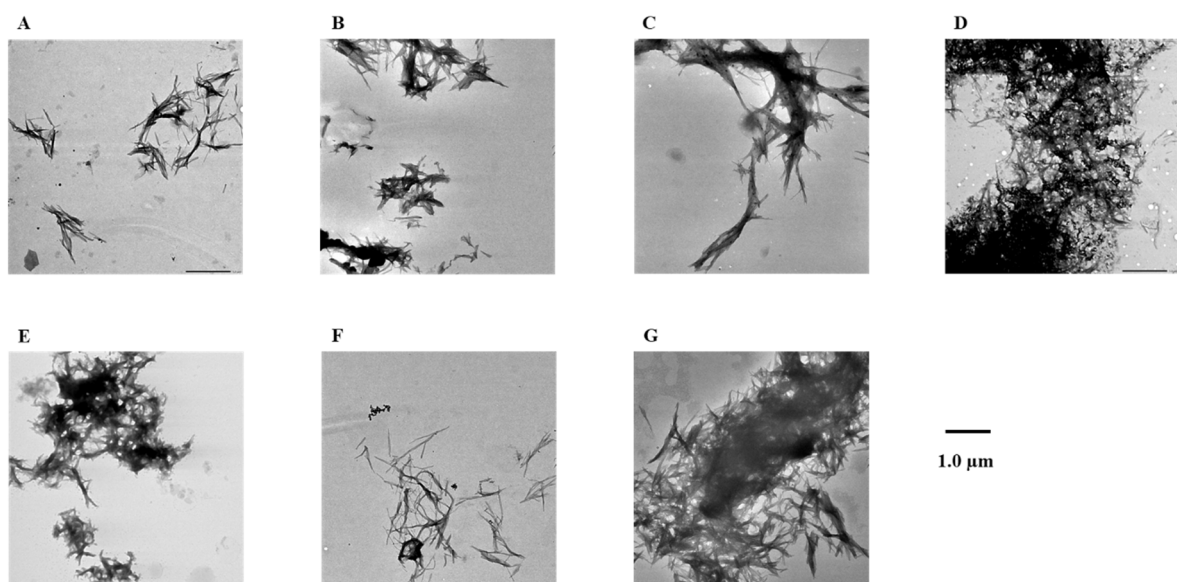

Figure S8
